# Supplementary material
Source: PubMed Central journal article supplement (PMC3179397)
Supplement: supp_blood-2011-01-333039_Document1.pdf [file supp_blood-2011-01-333039_Document1.pdf]

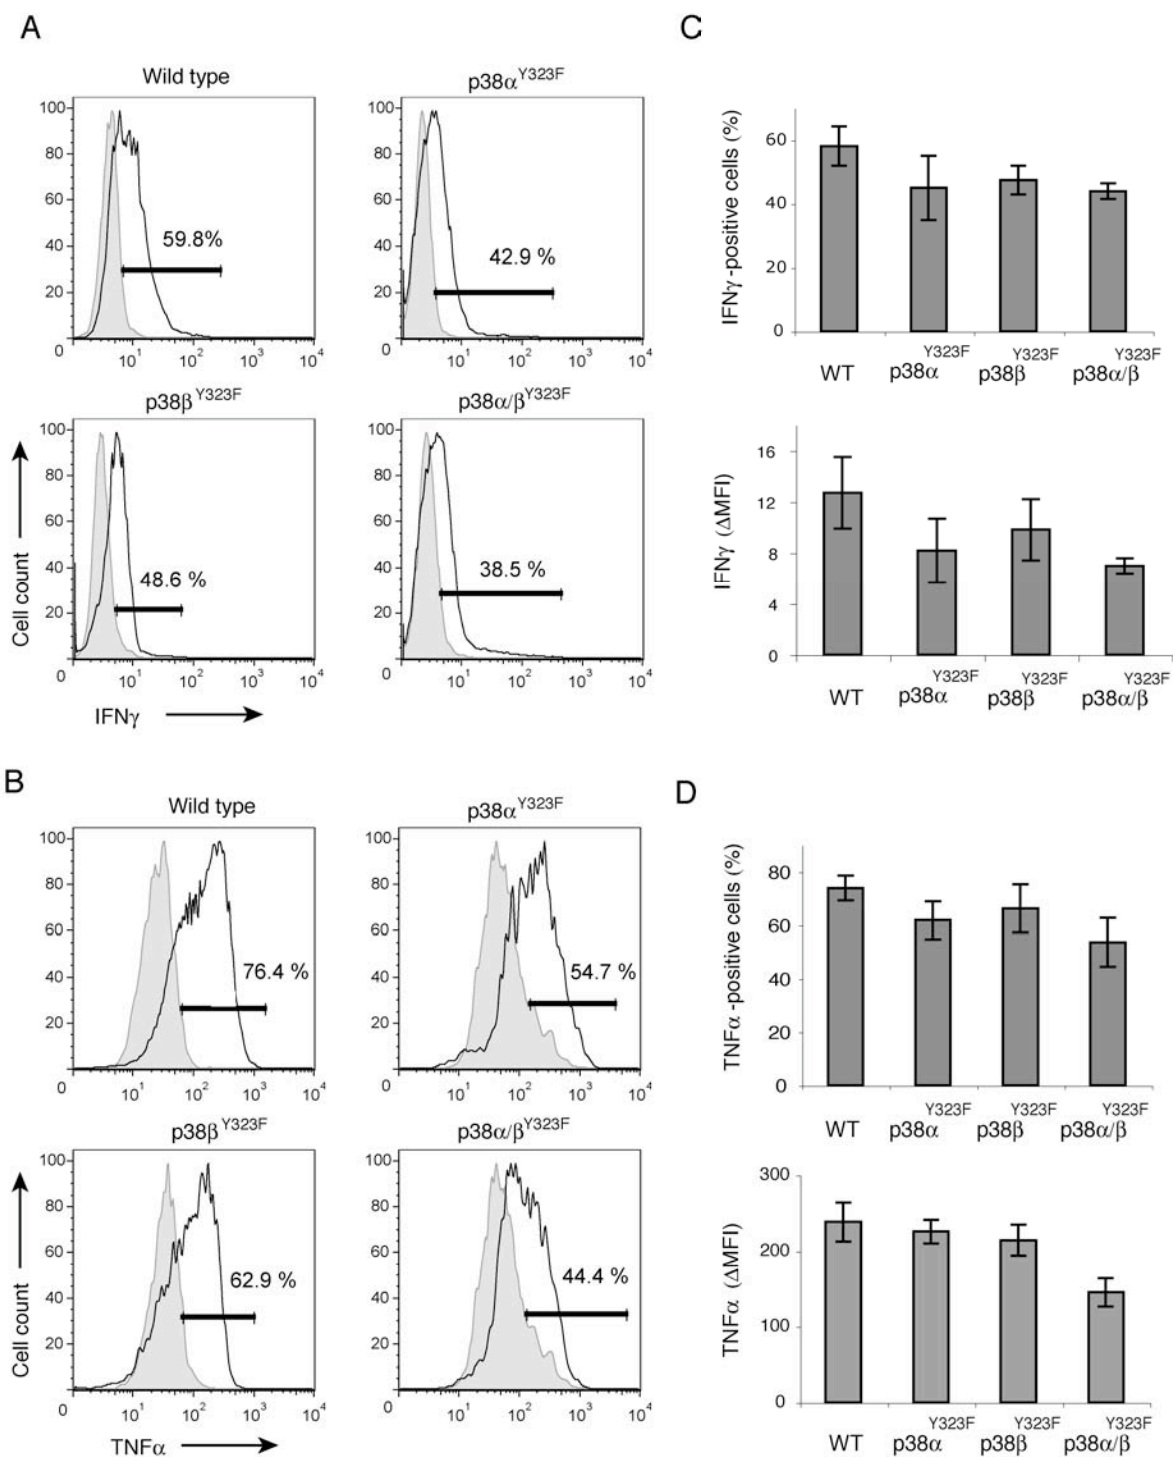

**Figure S1. Production of TNF- $\alpha$  and IFN- $\gamma$  is diminished in p38 $\alpha$ <sup>Y323F</sup> and p38 $\alpha$  $\beta$ <sup>Y323F</sup> T cells**  
 (A) Purified lymph node T cells were stimulated with plate-bound  $\alpha$ -CD3/ $\alpha$ -CD28 antibodies for 24 hr and IFN- $\gamma$  detected by intracellular staining. The gray histograms represents unstimulated cells, and the numbers indicated the percentage of positive cells. (B) T cells were cultured as in (A) and TNF- $\alpha$  was detected by intracellular staining. (C and D) Summary of three independent experiments for percentage and  $\Delta$ MFI of IFN- $\gamma$ - and TNF- $\alpha$ -positive cells. The bars represent the mean  $\pm$  SEM.

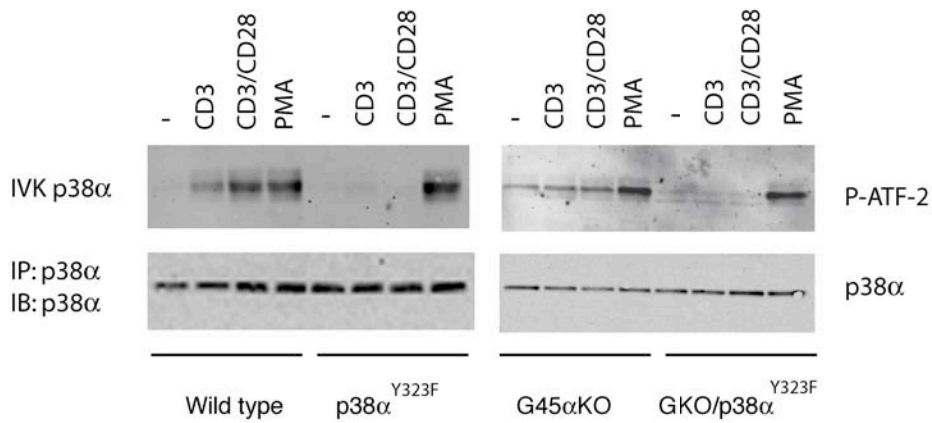

Figure S2. Introduction of p38 $\alpha^{Y323F}$  into Gadd45 $\alpha$ -deficient T cells prevents spontaneous and TCR-induced p38 $\alpha$  activity. T cells purified from lymph nodes of wild type, p38 $\alpha^{Y323F}$ , Gadd45 $\alpha$ KO (GKO), and GKO/p38 $\alpha^{Y323F}$  mice were stimulated with plate-bound  $\alpha$ -CD3/ $\alpha$ -CD28 for 30 min or with PMA for 10 min. p38 $\alpha$  was immunoprecipitated from detergent lysates and an in vitro kinase assay was performed using ATF-2 as substrate.

A

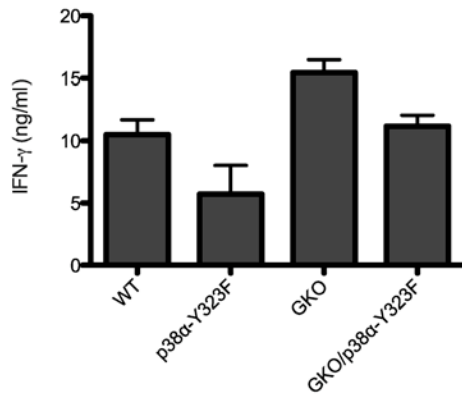

B

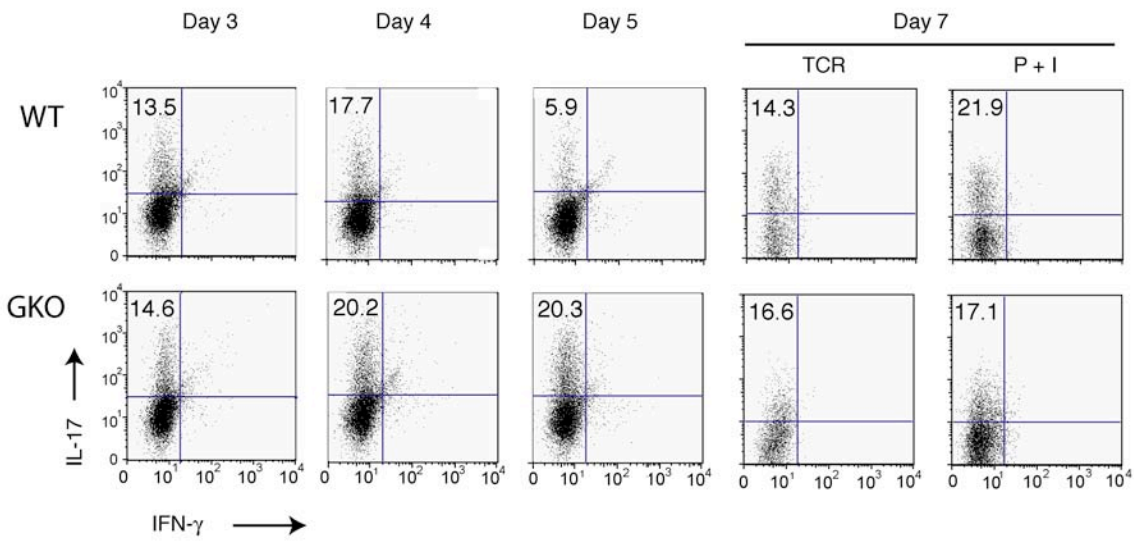

C

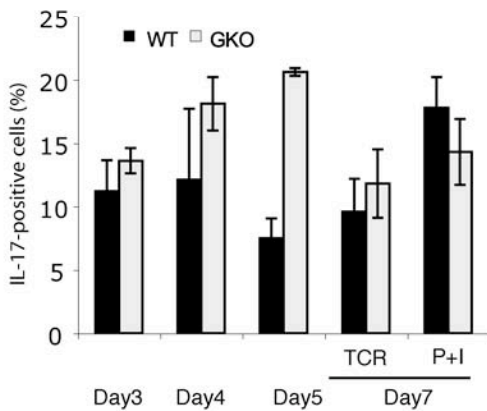

Figure S3. *Gadd45 $\alpha$*  knockout effector T cells express more IFN- $\alpha$  and IL-17 than WT T cells.

(A) Purified lymph node T cells from wild type, p38 $\alpha$ <sup>Y323F</sup>, *Gadd45 $\alpha$* KO, and GKO/p38 $\alpha$ <sup>Y323F</sup> mice were stimulated with plate-bound  $\alpha$ -CD3/ $\alpha$ -CD28 for 48 hr and IFN- $\gamma$  production was assessed by ELISA. The data represent the mean  $\pm$  SEM. (B) WT and GKO T cells were cultured under Th17 skewing conditions and stained for intracellular IL-17 and IFN- $\gamma$  on days 3, 4, and 5. A portion of the cells was differentiated into Th17 for 4 days, cultured with IL-2 for two days, rested overnight, and re-stimulated with  $\alpha$ -CD3 or P+I for 6 hr. (C) Summary of two independent experiments. Bars
